# Supplementary material for: Hydrazone-linked covalent organic frameworks for fluorescence detection of Hg2+
Source: Royal Society of Chemistry journal article supplement (doi:10.1039/d4cc05468g), 2024-01-01
Supplement: d4cc05468g1.pdf [file d4cc05468g1.pdf]

## **Electronic Supplementary Information (ESI)**

### **Hydrazone-linked Covalent Organic Frameworks for Fluorescence**

#### **Detection of Hg<sup>2+</sup>**

Xuefeng Wang,<sup>a</sup> Zhaowei Yang,<sup>a</sup> Lingsuo Meng,<sup>a</sup> Xuehui Li,<sup>a</sup> Hongtao Wei,<sup>a</sup> Jing Ning,<sup>a,\*</sup>  
Shitao Wang,<sup>b</sup> Dapeng Cao,<sup>b,\*</sup> and Long Hao<sup>a</sup>

<sup>a</sup> *College of Chemistry and Pharmaceutical Sciences, Qingdao Agricultural University, No.700  
Changcheng Road, Qingdao 266109, P. R. China.*

<sup>b</sup> *State Key Laboratory of Organic-Inorganic Composites, Beijing University of Chemical  
Technology, Beijing 100029, P. R. China.*

\*E-mail: [ningj@qau.edu.cn](mailto:ningj@qau.edu.cn), [caodp@mail.buct.edu.cn](mailto:caodp@mail.buct.edu.cn)

## Experimental Section:

### Materials:

Acetic acid (AcOH), 1,2-dichlorobenzene (*o*-DCB), tetrahydrofuran (THF), ethanol, and *N,N*-dimethylformamide (DMF) were purchased from Energy Chemical. 2,5-divinylterephthalaldehyde (DvDf) was purchased from Shanghai Haohong scientific Co., Ltd. 5'-(4-(hydrazinecarbonyl)-3-propoxyphenyl)-3,3''-dipropoxy-[1,1':3',1''-terphenyl]-4,4''-dicarbohydrazide (C3XJOPr) was purchased from Yanshen Technology Co., Ltd. All the reagents were used as received. All the solvents were of analytical purity, and used without further purification.

### Characterizations:

Attenuated total reflectance Fourier-transform infrared (FT-IR) spectra were acquired on a Nicolet iS50 spectrometer. Nitrogen adsorption and desorption isotherms were measured at 77 K using an ASAP 2020 plus HD88 analyzer. Powder X-ray diffraction (XRD) patterns were recorded with a D8 Advance diffractometer configured for reflection geometry, utilizing a Cu K $\alpha$  anode ( $\lambda = 1.54178 \text{ \AA}$ ) at 30 kV and 40 mA. The thermal stability was evaluated using a TGA-1 thermal gravimetric analyzer (TGA) instrument over the temperature range of 100 to 600 °C under nitrogen atmosphere with a heating rate of 10 °C/min. Specific surface areas (SSAs) and pore size distributions were calculated via the Brunauer-Emmett-Teller (BET) method and density functional theory (DFT) models. Fluorescence excitation and emission spectra were recorded using a Hitachi F-7000 fluorescence spectrometer with a 150 W xenon lamp as the excitation source. The fluorescence lifetimes were measured using an FLS 1000 fluorescence spectrometer with a 450 W xenon lamp as the excitation source and the resolution is 305 fs. X-ray photoelectron spectroscopy (XPS) measurements were carried out on a Thermo SCIENTIFIC ESCALAB Xi+ apparatus at a base pressure of  $1 \times 10^{-9}$  bar, and an X-ray source of Al K $\alpha$ .

**Experimental details:**

**DvDf-C3XJ-COF:** A 20 mL pyrex tube was charged with DvDf (16.76 mg, 0.09 mmol), C3XJOPr (39.29mg, 0.06 mmol), 0.1mL of 17 M AcOH, 2 mL of o-DCB. The mixture was sonicated for five minutes, degassed through three freeze-pump-thaw cycles, sealed under vacuum and heated at 120°C for 72 h. After cooling to room temperature, the precipitate was centrifuged and washed constantly with THF until the supernatant was clear. After dried in the vacuum oven at 120°C overnight, the DvDf-C3XJ-COF COF was synthesized.

**Figure S1 -S8:**

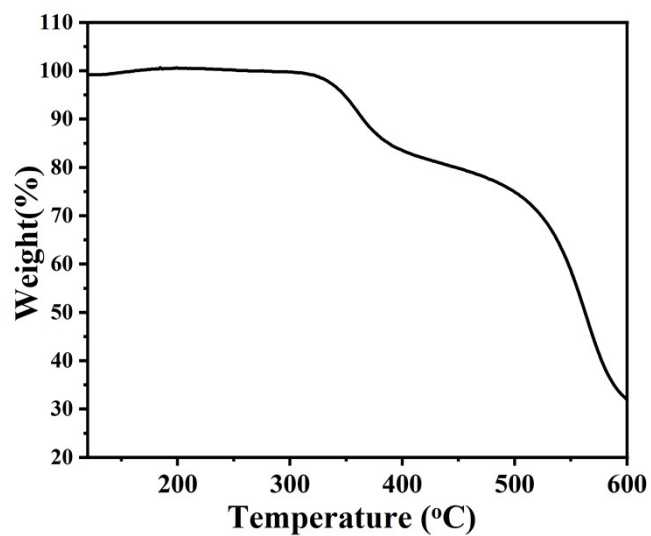

**Figure S1.** TGA data for DvDf-C3XJ-COF.

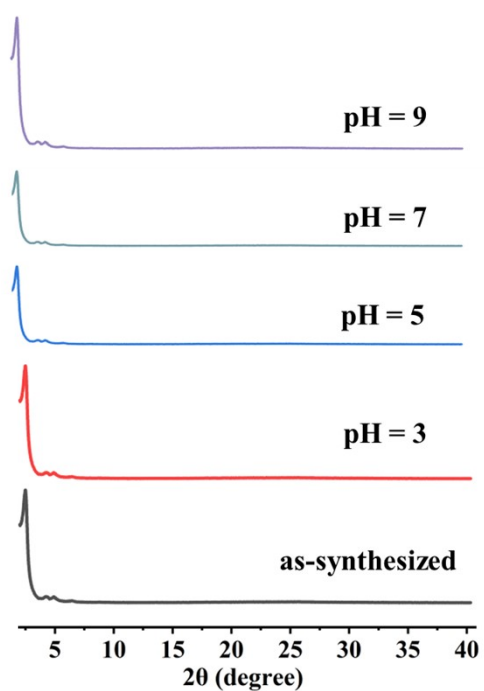

**Figure S2.** The PXRD patterns of DvDf-C3XJ-COF in aqueous solutions, spanning a pH range from 3 to 9.

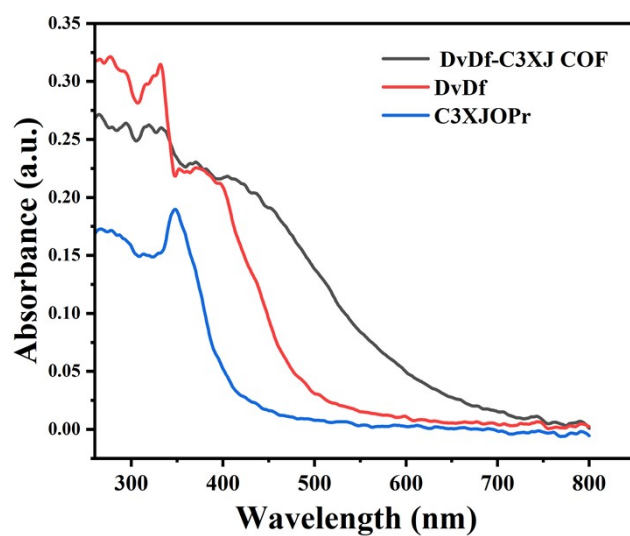

**Figure S3.** The UV-Vis absorption of DvDf, C3XJOPr, and DvDf-C3XJ-COF.

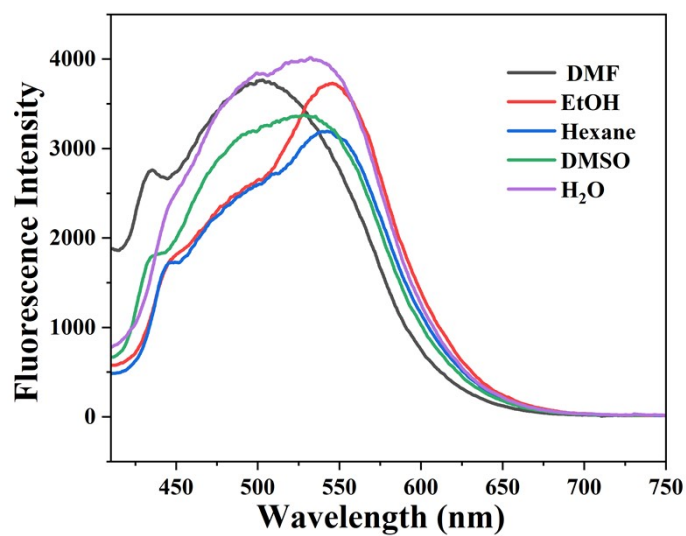

**Figure S4.** The fluorescence emission spectrum of DvDf-C3XJ-COF dispersed in different solvents.

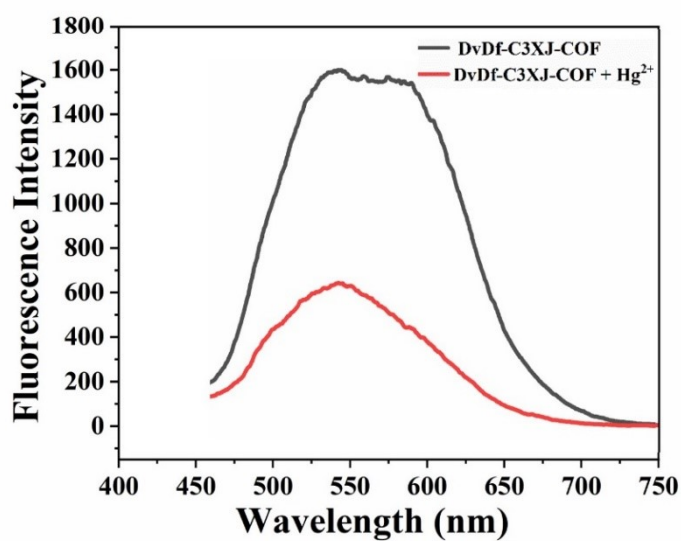

**Figure S5.** The fluorescence emission spectrum of DvDf-C3XJ-COF dispersed in different solvents.

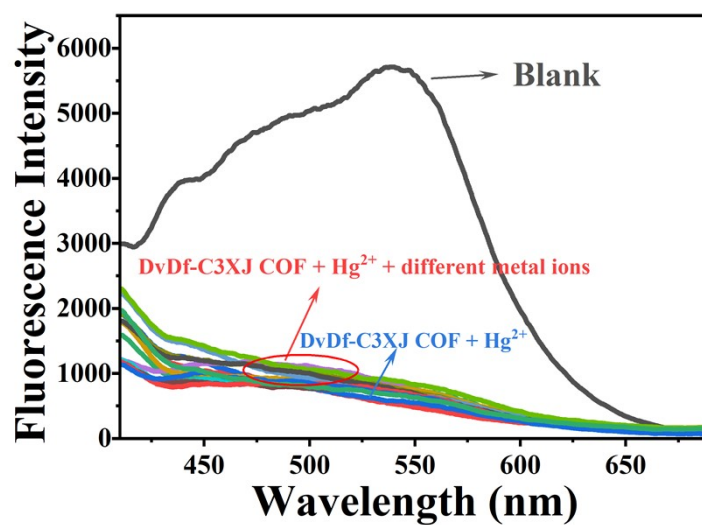

**Figure S6.** The fluorescence emission spectrum of DvDf-C3XJ-COF, DvDf-C3XJ-COF+Hg<sup>2+</sup>, and DvDf-C3XJ-COF+Hg<sup>2+</sup>+ different metal ions.

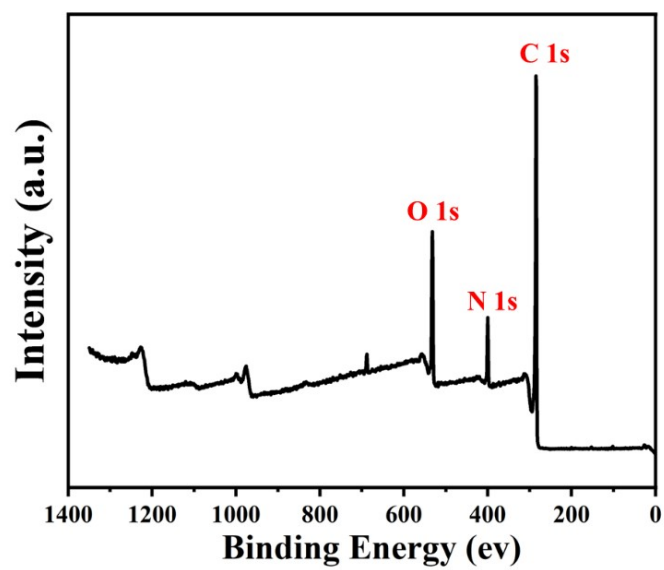

Figure S7. XPS survey spectrum of DvDf-C3XJ-COF.

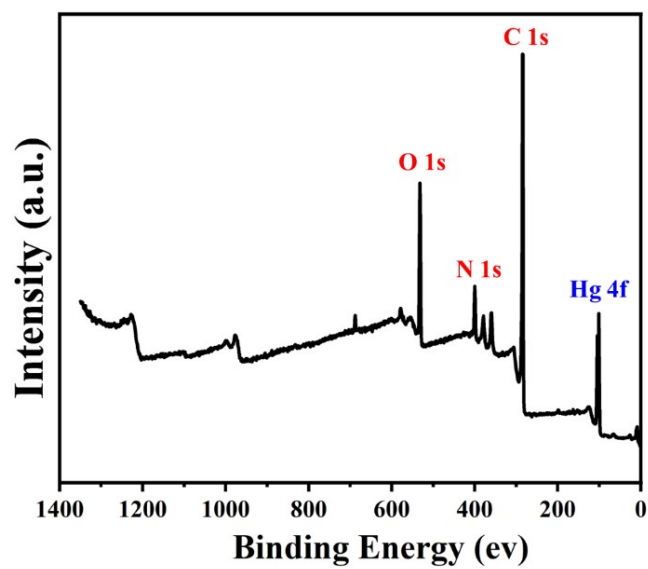

Figure S8. XPS survey spectrum of DvDf-C3XJ-COF+Hg<sup>2+</sup>.

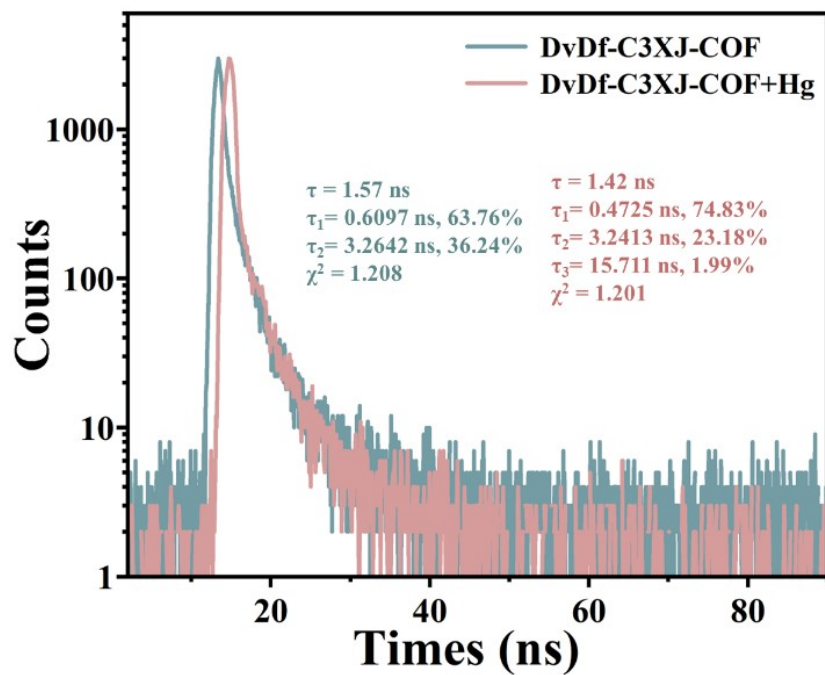

**Figure S9.** The fluorescence decay spectra of DvDf-C3XJ-COF and DvDf-C3XJ-COF+Hg<sup>2+</sup> dispersed in EtOH: H<sub>2</sub>O=1:1.



**Table S1.** Fractional atomic coordinates for DvDf-C3XJ-COF: space group  $P6/m$ ;  $a = b = 41.99 \text{ \AA}$ ,  $c = 3.53 \text{ \AA}$ ;  $\alpha = \beta = 90^\circ$ ,  $\gamma = 120^\circ$

| Atom | x(Å)    | y(Å)    | z(Å)     |
|------|---------|---------|----------|
| C1   | 0.32144 | 0.69017 | 0.07092  |
| C2   | 0.35718 | 0.7021  | 0.07092  |
| C3   | 0.38051 | 0.73795 | 0.07092  |
| C4   | 0.41625 | 0.74988 | 0.07092  |
| C5   | 0.44012 | 0.78551 | 0.07092  |
| C6   | 0.42824 | 0.80921 | 0.07092  |
| C7   | 0.3925  | 0.79728 | 0.07092  |
| C8   | 0.36863 | 0.76165 | 0.07092  |
| C9   | 0.45211 | 0.84485 | 0.07092  |
| N10  | 0.44024 | 0.86903 | 0.07092  |
| O11  | 0.48786 | 0.85678 | 0.07092  |
| O12  | 0.38062 | 0.82098 | 0.07092  |
| C13  | 0.34488 | 0.80905 | 0.07092  |
| N14  | 0.46411 | 0.90466 | 0.07092  |
| C15  | 0.46368 | 0.98791 | 0.07092  |
| C16  | 0.5113  | 0.97566 | 0.07092  |
| C17  | 0.45224 | 0.92836 | 0.07092  |
| C18  | 0.47555 | 0.96373 | 0.07092  |
| C19  | 0.52317 | 0.95196 | 0.07092  |
| C20  | 0.55892 | 0.96389 | 0.07092  |
| C21  | 0.33301 | 0.83323 | 0.07092  |
| C22  | 0.29726 | 0.82129 | 0.07092  |
| H23  | 0.31116 | 0.71068 | 0.07092  |
| H24  | 0.42653 | 0.72937 | 0.07092  |
| H25  | 0.47088 | 0.79567 | 0.07092  |
| H26  | 0.33787 | 0.75149 | 0.07092  |
| H27  | 0.41029 | 0.85917 | 0.07092  |
| H28  | 0.33245 | 0.79046 | 0.32866  |
| H29  | 0.33183 | 0.79166 | -0.19314 |
| H30  | 0.43293 | 0.97778 | 0.07092  |
| H31  | 0.42145 | 0.91809 | 0.07092  |
| H32  | 0.50266 | 0.92117 | 0.07092  |
| H33  | 0.57066 | 0.95073 | -0.12532 |
| H34  | 0.57796 | 0.98733 | 0.26717  |
| H35  | 0.34543 | 0.85182 | -0.18681 |
| H36  | 0.34362 | 0.85123 | 0.33498  |
| H37  | 0.28163 | 0.79096 | 0.1525   |
| H38  | 0.28839 | 0.82485 | -0.2243  |
| H39  | 0.29097 | 0.83779 | 0.28457  |

**Table S2.** The comparison of detection limit and linear range between DvDf-C3XJ-COF and other fluorescent probes.

| Material             | LOD ( $\mu\text{M}$ ) | Linear range ( $\mu\text{M}$ ) | References       |
|----------------------|-----------------------|--------------------------------|------------------|
| PET                  | 1.2                   | 0–40                           | 1                |
| AgNPs                | 2.85                  | 5–30                           | 2                |
| L                    | 0.989                 | 0–20                           | 3                |
| GSH                  | 4.3                   | 0–72                           | 4                |
| COF-Ag               | 0.0037                | 0.05–10                        | 5                |
| SH-COF               | 0.239                 | 0–80                           | 6                |
| TFPPy-CHYD COF       | 0.017                 | 0–4                            | 7                |
| Bpy-sp2c-COF         | 0.00242               | 0–0.02                         | 8                |
| AH-COF               | 20 ppb                | /                              | 9                |
| <b>DvDf-C3XJ-COF</b> | <b>1.65</b>           | <b>0–300</b>                   | <b>This work</b> |

## References

1. T. Rasheed, F. Nabeel, F. Sher, S.U.D. Khan, A.A. Al Kheraif, *J Mol Liq.* 2021, **327**, 114791.
2. A. Saenchoopa, W. Boonta, C. Talodthaisong, O. Srichaiyapol, R. Patramanon, S. Kulchat, *Spectrochim Acta A.* 2021, **251**, 119433.
3. K. Rout, A.K. Manna, M. Sahu, G.K. Patra, *Inorg Chim Acta.* 2019, **486**, 733–741.
4. H. Sharma, J.M. White, J.R. Lin, E.J. New, F.M. Pfeffer, *Sens Actuators B Chem.* 2019, **300**, 126825.
5. Q. Liu, C. Xu, S.u. Chu, S. Li, F. Wang, Y. Si, G. Mao, C. Wu, H. Wang, *J Mater Chem B.* 2022, **48**, 10075–10082.
6. W. Qi, S. Liu, M. Li, Q. Su, Q. Wu, *Microchem J*, 2023, **193**, 109041.
7. W. R. Cui, W. Jiang, C.-R. Zhang, R.-P. Liang, J. Liu, J.-D. Qiu, *ACS Sustainable Chem. Eng.* 2020, **8**, 445–451.
8. B. Zhu, L. Zhu, S. Deng, Y. Wan, F. Qin, H. Han, J. Luo, *J Hazard Mater*, 2023, **459**, 132081.
9. Y. Yu, G. Li, J. Liu, D. Yuan, *Chem Eng J*, 2020, **401**, 126139.
